## Medulloblastoma in adults – reviewing the literature from a surgeon's point of view

Thomas Eibl<sup>1</sup>, Alexander Hammer<sup>1</sup>, Eduard Yakubov<sup>1</sup>, Cristiane Blechschmidt<sup>2</sup>, Alexander Kalisch<sup>3</sup>, Hans-Herbert Steiner<sup>1</sup>

<sup>1</sup>Department of Neurosurgery, Paracelsus Medical University, Nuremberg 90471, Bavaria, Germany

<sup>2</sup>Department of Neuropathology, Paracelsus Medical University, Nuremberg 90471, Bavaria, Germany

<sup>3</sup>Department of Oncology, Paracelsus Medical University, Nuremberg 90471, Bavaria, Germany

**Correspondence to:** Thomas Eibl; email: [thomas.eibl@klinikum-nuernberg.de](mailto:thomas.eibl@klinikum-nuernberg.de)

**Keywords:** adult medulloblastoma, medulloblastoma, posterior fosa tumor, cerebellar tumor, aging

**Received:** August 3, 2020

**Accepted:** January 4, 2021

**Published:** January 26, 2021

**Copyright:** © 2021 Eibl et al. This is an open access article distributed under the terms of the [Creative Commons Attribution License](https://creativecommons.org/licenses/by/3.0/) (CC BY 3.0), which permits unrestricted use, distribution, and reproduction in any medium, provided the original author and source are credited.

### ABSTRACT

Medulloblastoma is a common primary brain tumor in children but it is a rare cancer in adult patients. We reviewed the literature, searching PubMed for articles on this rare tumor entity, with a focus on tumor biology, advanced neurosurgical opportunities for safe tumor resection, and multimodal treatment options. Adult medulloblastoma occurs at a rate of 0.6 per one million people per year. There is a slight disparity between male and female patients, and patients with a fair skin tone are more likely to have a medulloblastoma. Patients present with cerebellar signs and signs of elevated intracranial pressure. Diagnostic efforts should consist of cerebral MRI and MRI of the spinal axis. Cerebrospinal fluid should be investigated to look for tumor dissemination. Medulloblastoma tumors can be classified as classic, desmoplastic, anaplastic, and large cell, according to the WHO tumor classification. Molecular subgroups include WNT, SHH, group 3, and group 4 tumors. Further molecular analyses suggest that there are several subgroups within the four existing subgroups, with significant differences in patient age, frequency of metastatic spread, and patient survival. As molecular markers have started to play an increasing role in determining treatment strategies and prognosis, their importance has increased rapidly. Treatment options include microsurgical tumor resection and radiotherapy and, in addition, chemotherapy that respects the tumor biology of individual patients offers targeted therapeutic approaches. For neurosurgeons, intraoperative imaging and tumor fluorescence may improve resection rates. Disseminated disease, residual tumor after surgery, lower radiation dose, and low Karnofsky performance status are all suggestive of a poor outcome. Extraneural spread occurs only in very few cases. The reported 5-year-survival rates range between 60% and 80% for all adult medulloblastoma patients.

### INTRODUCTION

Medulloblastoma is a malignant primary brain tumor usually located in the posterior cerebral fossa. Most patients with medulloblastoma are children, but adolescents and adults may also present with this cerebellar tumor. Since adult medulloblastoma is an extremely rare disease, most investigations concern patients of younger age, especially investigations of molecular features and treatment protocols.

Medulloblastoma is a well-known tumor in children and a lot of research has been carried out in order to understand the molecular biology and molecular subgroups, as well as the signal pathways, underlying this tumor. All this knowledge has led to treatment protocols for children and possibilities for targeted therapy approaches for selected patients. Due to the limited number of adult patients with medulloblastoma, data and randomized trials are lacking, and these patients are sometimes treated within pediatric trials. On the other hand, the published data suggest

important differences between childhood and adult medulloblastoma, in terms of tumor biology, treatment strategies, and outcome predictors.

The incidence of medulloblastoma among all age groups is estimated at about 1.5 per million per year and the incidence of all primitive embryonal tumors is estimated to be about 2 per million per year [1, 2]. The incidence in adults is about 0.6 per million per year [2]. 1.5% of posterior fossa craniotomies among adult patients are for medulloblastoma [3], and the dispersion between males and females is about 1.5/1 for all embryonal tumors [1]. There is a slight disparity in the incidence of medulloblastoma between patients with different cultural backgrounds according to the SEER-register, and adults with a fair skin tone are more likely to have a medulloblastoma [2]. Most adult patients with medulloblastoma seem to be diagnosed between 20 and 40 years of age [4].

The aim of this review is to provide a short overview of this rare cancer, focusing on imaging features, opportunities for surgical treatment, molecular pathology, adjuvant treatment, and prognostic factors. Whenever possible, we have tried to enhance the differences between adult and childhood medulloblastoma, especially regarding prognostic factors and implications for therapeutic considerations. A summarized overview over this disease is provided in Table 1.

## Methods

In 2020, we reviewed the literature using a selective PubMed search on adult medulloblastoma with an emphasis on the factors mentioned above. We used the search terms “medulloblastoma in adults”, “adult medulloblastoma”, “medulloblastoma 5-ALA”, “vismodegib”, “vismodegib medulloblastoma”, “medulloblastoma temozolomide”, “temozolomide”, “cerebellar tumor”, “medulloblastoma metastases”, “medulloblastoma complications”, “medulloblastoma desmoplastic”, “medulloblastoma hydrocephalus”, “posterior fossa tumor surgery”, “neuromonitoring posterior fossa”. We also searched cited references among the results and we also reviewed articles suggested by PubMed as similar articles among the search results. Articles were selected by title and/or abstract, published in English, availability of the full text, published date (preferred not published before 2000), and number of patients in clinical trials. Selected case reports were also included.

## Clinical presentation

The length of disease history of medulloblastoma patients is usually only up to a few weeks from the

onset of symptoms up to admission to hospital [5–7]. Many patients with medulloblastoma are admitted to hospital with signs of intracranial pressure, including headache, nausea or disturbances of consciousness caused by hydrocephalus due to a tumor in the posterior fossa [6, 8]. Furthermore, a cerebellar mass lesion can cause vertigo, coordination disorders, ataxia or palsies of the cranial nerves, resulting in visual abnormalities, oculomotor disorders and nystagmus [7, 9].

## Diagnostic and staging

As a first diagnostic procedure, a cranial CT-Scan is often performed. In the case of medulloblastoma patients, the tumor mass typically appears hyperdense on the CT scan [10, 11]. Further diagnostic exams should be carried out after the initial proof of a cerebellar tumorous mass. These include cerebral MRI and spinal MRI, as medulloblastomas tend to seed metastases along the spinal axis. Cerebrospinal fluid cytology should be carried out in order to detect leptomeningeal spread of the tumor. This is usually performed after debulking surgery to avoid cerebellar herniation.

Medulloblastoma in children arises from the vermis and is often located in the cerebellar midline [6]. In contrast to this tumor location, adult medulloblastoma can also be found in the cerebellar hemispheres [12].

In MR-Imaging, medulloblastomas usually present as enhancing tumors with sharp margins, sometimes with diffuse enhancement uptake [13, 14]. In T1-weighted sequences, medulloblastoma is typical iso- or hypointense compared to cerebellar tissue [14]. In T2-weighted images (T2WI), medulloblastomas are present as a heterogenous signal. In one series, classic and anaplastic medulloblastomas appeared hyperintense in T2WI [14]. Desmoplastic and medulloblastoma with extensive nodularity appeared isointense in T2WI [14]. In Diffusion Weighted Imaging (DWI), medulloblastomas suggest a restriction of diffusion [14], and DWI might be helpful to rule out other tumor entities as a differential diagnosis [13]. Cystic tumor components can be found in all medulloblastoma subtypes, whereas calcifications and hemorrhage are less common features [14]. MRI-findings derived from patients enrolled into the NOA-07-trial [15] revealed hemorrhage, hydrocephalus, and intraventricular metastases as sensitive parameters to identify WNT-activated medulloblastomas in adults [16].

Chang et al. developed a staging system for medulloblastoma based on the local tumor extent and metastases. ([17] citation in [18]) This historic staging system is derived from the TNM-System for other

**Table 1. Overview over the most relevant facts about adult medulloblastoma.**

| <b>Medulloblastoma in adults - quick overview</b> |                                  |
|---------------------------------------------------|----------------------------------|
| <b>Epidemiology</b>                               |                                  |
| Incidence                                         | 0.6/1 000 000                    |
| Age peak                                          | 20 - 40 yrs                      |
| Male/Female                                       | 1.5/1                            |
| <b>Staging</b>                                    |                                  |
|                                                   | cranial MRI                      |
|                                                   | spinal MRI                       |
|                                                   | CSF cytology                     |
| <b>Treatment</b>                                  |                                  |
| Surgery                                           | aim to achieve no residual tumor |
| Craniospinal Irradiation                          | up to 36 Gy                      |
| Posterior fossa boost                             | up to 55 Gy                      |
| Adjuvant Chemotherapy                             | different protocols              |
| <b>Surveillance</b>                               |                                  |
|                                                   | cranial MRI                      |
|                                                   | spinal MRI                       |
|                                                   | CSF cytology                     |
| <b>Prognostic factors (for worse outcome)</b>     |                                  |
|                                                   | male patients                    |
|                                                   | residual tumor after surgery     |
|                                                   | metastatic spread                |
|                                                   | lower radiation dose             |
|                                                   | no chemotherapy                  |
| <b>Overall Survival</b>                           |                                  |
|                                                   | 60 - 80%/5 yrs                   |
|                                                   | 55%/10 yrs                       |

tumor entities, where the T-stage describes local tumor infiltration (T1-T4) and the M-stage describes the extent of metastatic seeding, cerebrospinal fluid invasion, and distant metastases (M0-M4).

In adult patients there might be a prognostic relevance depending on the T-stage [19].

The Chang-Classification is nowadays of historic value and Medulloblastomas are classified according to the WHO and according to molecular features that will be discussed in the following.

Differential diagnoses for medulloblastoma include cerebellar tumorous lesions, such as ependymoma, hemangioblastoma, vestibular schwannoma, glioblastoma, choroid plexus papilloma, cerebellar lymphoma and cerebellar metastases of systemic tumors [8].

### **Histopathology**

Medulloblastomas are WHO grade IV tumors [20, 21]. According to the WHO classification, medulloblastoma

can be divided into different histopathological subgroups [20, 21]. These are described as classic, desmoplastic, anaplastic, and large cell medulloblastoma, as well as medulloblastoma with extensive nodularity. In recent years, the importance of molecular subgroups has increased in tumor treatment due to possible targeted therapies and the prognostic influence of certain molecular subtypes. In medulloblastoma in general, four molecular variants are of great importance: WNT, SHH, group 3, and group 4 [22].

The 2016 WHO classification gives an overview of the histological and genetical variants and a pathologist should make a diagnosis respecting both molecular aspects and the phenotype of the tumor. The classification includes WNT, SHH, and TP53 as molecular markers [21]. The WHO classification shows most integrated medulloblastoma diagnoses. The classic and anaplastic/large-cell histologic subtypes can be found with any molecular constellation, whereas desmoplastic medulloblastomas are usually SHH-activated [23]. On the other hand, WNT positive tumors usually show a classic histology [24].

Histopathological tumor diagnosis and classification is the same in children and in adults, but the distribution of tumor subtypes is different in adult medulloblastoma patients [22, 23]. Children are most often diagnosed with the classic medulloblastoma subtype [23]. Infants and adults are more often diagnosed with a desmoplastic subtype [23]. Authors found three subtypes of adult medulloblastoma, WNT, SHH and Group D/4, whereas Group 3 medulloblastomas are extremely rare in adult patients [25, 26]. On the other hand, desmoplastic and SHH-activated medulloblastomas are the most common subtype in adults. Another approach suggests more molecular subtypes exist within the four molecular groups [27]. This more detailed molecular classification subclassifies each subtype into another two, three, or four subtypes, respecting other molecular markers such as MYC, MYCN, and CDK6. This investigation also indicated an age-related distribution within the subgroups, and the detailed molecular subtypes were also found to influence metastases and overall prognosis. WNT beta and SHH delta subtypes seem to be exclusively found in adult patients [27].

Northcott et al. [28] demonstrated that further molecular and cytogenetic differences exist in the pediatric and adult cohort for Sonic Hedgehog-activated medulloblastomas. For instance, chromosome 10q deletion and MYCN amplification occurred more often in pediatric than in adult SHH-activated medulloblastomas [28]. Regarding prognostic factors, metastatic spread was found to be of prognostic significance in adults but not in pediatric patients with SHH-activated medulloblastoma [28]. Korshunov et al. [12] also found several molecular differences between adult and childhood medulloblastoma. They showed evidence for CDK6, 10q loss, and 17q gain as prognostic markers in adults and could not find a prognostic significance for MYC/MYCN amplification [12, 29]. Among WNT and SHH-activated tumors, tumors with TP53 mutation are peculiar, since these tumors occur in a different age group (mostly between 5-18 years), show a higher rate of anaplasia and indicate an inferior prognosis for the patients in the SHH subgroup [30]. Further research revealed several additional molecular markers for WNT- and SHH-activated medulloblastomas [24]. WNT-positive medulloblastomas were strongly linked to nuclear and cytoplasmic immunoreactivity for  $\beta$ -catenin, filamin A, and YAP1, whereas SHH-activated tumors showed immunoreactivity for GAB1, YAP1, and filamin A [24]. Non-WNT/-SHH tumors were not positive for GAB1 and YAP1-markers and could, therefore, be distinguished from the other subgroups [24].

Research found evidence for major differences in adult medulloblastomas compared to the pediatric tumor concerning distribution of subtypes, genetic alterations

and prognostic factors which should be taken into account for making a histological diagnosis and as prognostic markers as shown above.

Given that there are at least four histological and at least four molecular subgroups for this tumor entity, the question arises if all medulloblastomas have the same origin of tumor growth. WNT and SHH-tumors seem to arise from different precursor cells, either in the dorsal brainstem, the fourth ventricle, or the cerebellum [31].

Trials investigating imaging criteria and histological subtype have revealed a coherence between specific imaging features, such as tumor location, imaging signal intensity, and molecular subtype in children [14, 32, 33]. WNT medulloblastomas were found in the cerebellopontine angle cistern and cerebellar peduncle, SHH-activated medulloblastomas were located within the cerebellar hemispheres, and group 3 and group 4 tumors were located in the midline and fourth ventricle [33, 34]. Perreault et al. showed that group 4 medulloblastomas are non-enhancing in about half of the patients, with a high predictive value for group 4 tumors [34]. In children, WNT medulloblastomas can also be found at Foramen Luschka and the fourth ventricle [32, 35]. Typical findings for intracerebral tumors such as edema, necrosis or cystic formations are mostly non subgroup specific [34].

## Treatment

Therapeutic strategies include tumor surgery, radiation, and chemotherapy [19]. Treatment strategies should be adapted to the patient's clinical status and tumor biology.

## Surgery

Perioperatively, patients should be monitored on an intensive care unit as posterior fossa tumors can cause acute hydrocephalus and tonsillar herniation [36]. In cases of patients presenting with hydrocephalus and clinical signs such as depression of consciousness, it is sensible to place an extraventricular drain into a lateral ventricle in order to carefully relieve intracranial pressure.

Tumor resection is performed in order to gain tumor tissue for histopathological examination, molecular classification, and diagnosis. The prognostic value of total tumor resection is not definitely clear in adult patients. However, guidelines recommend a gross tumor resection if possible [5, 19, 37] and Call et al. could find a prognostic benefit for patients who undergo gross tumor removal [38]. Data show a correlation between residual tumor and T-stage, suggesting that a total and

radical resection of greater tumor mass in the posterior cranial fossa is often not possible as neurosurgeons try to keep patient safety and neurological outcomes at an acceptable level. Leaving no residual tumor should be achieved if the risk for complications is acceptable and the functional outcome for the patient is favorable [19]. Total tumor resection also helps to reduce intracranial pressure, pressure to the brainstem, and hydrocephalus. Therefore, gross tumor resection treats the symptoms caused by the tumor.

Surgery for medulloblastoma is usually performed via a midline infratentorial craniotomy in a sitting or lateral-oblique (park-bench)-position using a neuronavigation system [36, 39]. Positioning of the patient does not influence surgical success in cerebellar tumor resection [40]. Positioning-related complications, such as air-embolism in the sitting position, need to be respected [39, 41, 42]. There seem to be no special patient-dependent risk factors for air embolism and the semi-sitting patient positioning appears not to influence complication rates of posterior fossa surgery [39]. Other analyses even show less surgical complications, such as bleeding, aside from air embolism for the semi-sitting position [41, 43].

Intraoperative monitoring may be applied for infratentorial lesions, offering good negative predictive values for postoperative deficits [44, 45]. Monitoring for infratentorial microsurgery usually includes somatosensory evoked potentials and motoric evoked potentials (SEP and MEP) [45]. Slotty et al. [44] presented a series of 305 patients undergoing posterior fossa craniotomy for several pathologies, and intraoperative monitoring of cranial nerves and SEP/MEP were used [44]. The authors found evidence for intraoperative signal alterations for lesions in distinct locations such as brainstem, and midline lesions, whereas tumor surgery within cerebellar hemispheres appeared to be safer concerning postoperative neurologic sequelae [44]. In the future, further developments in neuromonitoring and tools for dynamic mapping will probably increase safe resections with reduced rates of patients harboring a postoperative deficit [46].

The complications of midline suboccipital craniotomy and tumor resection include bleeding, hydrocephalus, palsies of lower cranial nerves, ataxia, visual disturbances, and dysphagia [47].

Intraoperative tumor fluorescence (5-aminolevulinic-Acid) is an established method in glioma surgery and intraoperative fluorescence angiography (indocyanine-green) is in routine use for neurovascular procedures. However, neither is widely used for the resection of non-glioma tumors [48–51]. In glioblastoma removal,

5-aminolevulinic-acid guided surgery has become a standard procedure improving rates of tumor removal [52–54]. There have been published case series and case reports trying to adapt intraoperative fluorescence in medulloblastoma surgery as well but there is no routine use of intraoperative fluorescence. *In vitro* studies suggest a possible fluorescence of medulloblastoma cell lines which is weaker than in glioblastoma cells [55]. Published *in vivo* trials suggest that the fluorescence caused by medulloblastoma cells is too inconsistent and only 20–25% of the tumors in reported case series show adequate fluorescence to help neurosurgeons perform a better tumor resection [56, 57].

Intraoperative MRI is also commonly used for resection of glial tumors, if available. With the use of intraoperative MRI, total tumor resection rates of glial tumors are significantly higher [48]. Data has also demonstrated the advantages of intraoperative MRI for pediatric tumors and posterior fossa tumors [58, 59]. However, data concerning intraoperative MRI, especially for the resection of medulloblastomas, is lacking but it seems sensible to perform intraoperative imaging for increased surgical quality and patient safety during tumor resection. On the other hand, intraoperative imaging requires a high amount of expertise, lengthens the time of anesthesia, and increases the time the patient spends in the operating theatre.

Some patients will need cerebrospinal fluid diversion as the cerebellar tumor causes hydrocephalus. It may be sensible to perform a third ventriculostomy if possible [60]. If patients need a ventriculoperitoneal shunt, there will be an increased risk for peritoneal metastases due to tumor cells seeding via cerebrospinal fluid diversion [61–63]. In a pediatric cohort, around 20% of the patients required cerebrospinal fluid diversion [64]. For adult patients with any posterior fossa lesions, preoperative presence of hydrocephalus is a risk-factor for shunt-dependency after tumor resection [3].

A postoperative cranial MRI should be performed within 48 hours after surgery documenting the extent of resection and revealing bleeding or other complications [19]. In some cases, a second look surgery might be considered if there is more than 1.5cm<sup>2</sup> of residual tumor after first surgery [19]. Investigations among childhood medulloblastoma found a negative prognostic value for a residual tumor greater than 1.5cm<sup>2</sup> on postoperative imaging [37]. When studying the molecular subgroups of medulloblastoma, gross or near total resection was only associated with a better outcome for group 4 patients [37].

In adult patients the extent of resection significantly influences the overall survival of the patients [12].



In cases of repeated microsurgery for posterior fossa tumors, no statistically increased risk of morbidity or mortality due to a second craniotomy was found [65].

## Radiotherapy

Surgical removal of the tumor should be followed by craniospinal irradiation and a boost to the posterior fossa in any patient. Radiotherapy increases local tumor control and leads to a prolonged progression free survival [4, 66].

Guidelines recommend 35.2 - 36 Gy to the craniospinal axis, divided into daily fractions of 1.6 or 1.8 Gy [19]. In addition to this, a boost to the posterior cranial fossa of up to 54 to 55.8 Gy should be performed [19].

Brandes et al. [67] performed a prospective trial with 26 adult patients who were divided into two groups depending on whether their tumor was classified as average or high risk. Average risk patients received radiotherapy without chemotherapy, whereas high risk patients were treated with radiochemotherapy after tumor resection. Radiotherapy was applied as craniospinal irradiation, with a total dose of 36 Gy divided into 20 fractions. Additionally, a boost to the posterior fossa of 18.8 Gy altogether, divided into 10 fractions, was applied. In the average risk group, 60% of the patients relapsed after a follow-up of almost 11 years. Overall survival in patients only treated with radiotherapy was 80% after 5 years [67]. In a small cohort of only 16 patients treated with radiotherapy, Buglione reported a 5 year overall survival of 75% and a 10 year survival of 67% [68].

Padovani et al. [69] presented a large retrospective series of adult medulloblastoma patients treated in several centers over a period of over 30 years. They reviewed the records of 253 adult patients. 66% had a classic histologic subtype and 30% had a desmoplastic tumor. After surgical tumor resection, 37% had a residual tumor [69]. Postoperative radiotherapy was performed in almost every patient with median doses of 35 Gy to the brain with a 54 Gy boost to the posterior fossa and also 35 Gy to the spinal axis [69]. A lower boost to the posterior fossa and a lower spinal radiation dose could be identified as prognostic markers for overall survival whereas a lower cranial radiation dose did not influence overall survival [69]. Also the duration of radiation did not influence the prognosis of the patients [69].

## Chemotherapy

Most published cohorts of adult medulloblastoma patients have been reviewed retrospectively and randomized trials are lacking. As children are usually

treated with chemotherapy in addition to surgery and craniospinal irradiation, a great number of adult patients have also received chemotherapy.

For pediatric patients, Packer established polychemotherapy in the 1990s and the regimen consisted of vincristine, lomustine, and cisplatin. [18, 70, 71]

The role of chemotherapy is of great importance in adult patients and systemic therapy is recommended in current guidelines [19]. All adult patients with higher risk tumors should receive a systemic tumor treatment since survival rates are higher in patients with chemotherapy compared to patients only treated with radiotherapy [5, 72]. However, Brandes et al. recommend radiotherapy alone in average risk patients [73].

In the prospective multicenter NOA-07 trial, adult medulloblastoma patients were treated with radiochemotherapy followed by maintenance chemotherapy. [15] The treatment protocol consisted of radiotherapy with simultaneous application of vincristine. As a maintenance chemotherapy, vincristine, cisplatin, and lomustine were used. The aim of the study was to evaluate feasibility, efficacy, and toxicity of this regimen. Due to the rarity of medulloblastoma in adults, only thirty patients were enrolled on the study, and 67% of these had an SHH-activated tumor. Gross total resection was achieved in 50% of the patients and almost 75% had a complete response after radiochemotherapy [15]. Patients in this cohort underwent dose reduction due to treatment toxicity, including leukopenia, polyneuropathy, and ototoxicity. Progression free survival and overall survival at 3 years was 66.6% and 70%, respectively [15].

Friedrich et al. [74] observed adult patients with nonmetastatic medulloblastoma treated with radiochemotherapy and maintenance chemotherapy consisting of lomustine, vincristine, and cisplatin. During treatment, about 74% of the patients experienced neuropathy and 55% had hematotoxic adverse effects. Overall survival at four years was 89%. Negative prognostic factors were desmoplastic histology combined with a lateral tumor location and also the presence of residual tumor after surgery. The authors concluded that maintenance chemotherapy appears to improve overall survival, with an acceptable toxicity profile. Moreover, in this study, vincristine led to the most dose reductions [74].

Brandes et al. [67] conducted a study indicating radiochemotherapy for high-risk patients, as mentioned above. Risk stratification was applied, according to the Chang staging system and the presence of residual tumor. High-risk patients had T3b or T4 disease and/or a residual tumor after surgical resection [67]. The

chemotherapy regimen was different compared to the two other trials outlined above. Firstly, the regimen consisted of mechlorethamine, vincristine, prednisolone, and procarbazine, and was later replaced by cisplatin, etoposide, and cyclophosphamide [67]. Moreover, high-risk patients received chemotherapy before and after craniospinal irradiation, whereas low-risk patients were only treated with radiotherapy [67]. Survival rates were inferior in patients with T3b or T4 disease [67].

Call et al. [38] retrospectively reviewed 66 adult patients over a median time of 6.7 years. Chemotherapy was applied to almost half of the cohort, and the regimen was mostly based on cyclophosphamide and/or cisplatin. They were unable to find a significant effect on overall survival. Patients with a classic histology had improved local tumor control when chemotherapy had been applied [38]. Interestingly, patients in this cohort were treated over decades, and those patients who underwent therapy in the 1970s did not have a statistically inferior outcome as compared to patients treated in the 2000s [38].

In a small cohort of only 11 adult patients with high risk tumors, the use of pre-radiation chemotherapy was studied [75]. High-risk was defined as residual tumor greater than 1cm<sup>2</sup> or subarachnoid dissemination. Chemotherapy consisted of cisplatin, cyclophosphamide, etoposide, and vincristine. Response rates before radiation were low, and overall survival did not exceed 60% [75]. The authors of this trial did not see a clear benefit of chemotherapy before radiation in their series with a limited number of patients. Table 2 summarizes selected trials dealing with adult medulloblastoma.

The studies described above used a combination of several chemotherapeutic agents. Also temozolomide, which is widely used in the treatment of high grade gliomas, [76] has been subject of several medulloblastoma trials, mostly in childhood patients. Temozolomide was used either as a monotherapy or combined with other antiproliferative substances, e.g. irinotecan or bevacizumab, [77–80]. Investigations have also focused on response rates for pediatric patients with disseminated or progressive disease, and response rates of more than 40% have been reported [81].

SHH-activated medulloblastomas can be treated with vismodegib as a targeted therapeutic agent, [82, 83] and the drug is available orally [82]. *In vitro* analyses have demonstrated a strong antiproliferative effect of vismodegib alone and vismodegib in combination with PI3K/AKT/mTOR-inhibition and/or cisplatin [84]. The *in vitro* studies indicate a chemosensitizing function of vismodegib, which increases the cytotoxic impact of cisplatin *in vitro* [84].

Vismodegib leads to an increased progression-free and increased overall survival [83, 85, 86]. Initially developed to treat basal cell carcinoma, vismodegib has been approved as a chemotherapeutic agent for recurrent SHH-medulloblastoma resulting in better response rates in almost half of the patients [86]. Rates of adverse events are reported to be low, largely confined to nausea and a reduction of white blood cell count [86]. Case reports have shown impressive responses to vismodegib in occasional patients [85]. Adverse effects include muscle spasms, nausea, dysgeusia, weight loss, and fatigue [83].

### Disseminated disease

Medulloblastoma is a tumor entity that tends to seed metastases in the spinal axis. The cerebrospinal fluid should be investigated for tumor dissemination in the initial staging, and this is also recommended during follow-up exams. Moreover, extraneural metastases have been reported in parts of patient cohorts and case reports [87–90]. Metastatic spread is more common in infants and children [23]. Extraneural metastases also occur in adult medulloblastoma patients and a few case reports have been published [87, 88, 91]. Primary tumors and metastatic lesions are usually present with the same molecular subgroups, as analyzed by gene expression, methylation analysis, and immunohistochemistry [92]. The most common sites for metastatic spread outside the CNS are the bone and bone marrow [90].

The HIT 2000 trial aimed to achieve an appropriate chemotherapy treatment protocol for adult patients with metastatic or disseminated disease [93]. Patients received either postoperative chemotherapy followed by radiotherapy and maintenance chemotherapy, or maintenance chemotherapy alone [93]. During the four years of follow-up, the event free survival was about 52%, with an overall survival of over 90% [93]. In this small cohort of slightly more than 20 patients, patients with an anaplastic subtype did not survive, whereas patients with classic or desmoplastic histology had a more favorable overall survival [93]. Treatment toxicities were mainly neurotoxicity, occurring in half of the patients. Intrathecal application of methotrexate was reported without adverse effects in most patients [93].

### Surveillance, prognostic factors, and survival

Tumor relapse can occur months and years after primary therapy [94]. For this reason, systematic surveillance and follow-up examinations are of great importance to achieve the best long-term prognosis for medulloblastoma patients after the first tumor treatment. The aim of follow-up is to check for local relapse or tumor progression, metastatic spread, and treatment

**Table 2. Overview over selected clinical trials concerning adult medulloblastoma.**

| Overview of selected adult medulloblastoma cohorts |      |                 |                                                   |                             |
|----------------------------------------------------|------|-----------------|---------------------------------------------------|-----------------------------|
| Author                                             | Year | No. of patients | Special characteristics                           | Overall survival            |
| Brandes et al.                                     | 2007 | 26              | Adjuvant Chemotherapy (CRT) vs. Radiotherapy (RT) | 80% (CRT)/73%(RT)/5 yrs     |
| Padovani et al.                                    | 2007 | 253             |                                                   | 75%/5 yrs - 55%/10 yrs      |
| Friedrich et al. (HIT-2000)                        | 2013 | 70              | Adjuvant Chemotherapy                             | 89%/4 yrs                   |
| Call et al.                                        | 2014 | 66              |                                                   | 74%/5 yrs                   |
| von Bueren et al. (HIT-2000)                       | 2015 | 23              | Metastatic disease                                | 91%/4 yrs                   |
| Kann et al. (NOA-07)                               | 2017 | 751             | Adjuvant Chemotherapy (CRT) vs. Radiotherapy (RT) | 86.1% (CRT)/71.6%(RT)/5 yrs |
| Moots et al.                                       | 2018 | 11              | Pre-radiation Chemotherapy                        | 55%/5 yrs                   |

toxicity, and side effects should be regarded as well. Follow-up examinations should be carried out every three months during the first 5 years, including cerebral and spinal imaging as well as cerebrospinal fluid examination [19]. It is sensible to perform follow-up examinations until 10 years after diagnosis [19].

Brandes et al. [67] found a high risk for recurrent disease, even after 7-10 years after completed tumor treatment. In the SEER database, the survival of adult medulloblastoma patients was 79.9% at 2 years, 64.9% at 5 years and 52.1% at 10 years [4]. Other investigations have revealed a number of factors influencing survival for adult medulloblastoma. These include the male sex, molecular subtype of the tumor, Chang risk stratification, presence or absence of metastases, extent of resection, irradiation dose, maintenance chemotherapy, and Karnofsky performance status [12, 72, 95]. WNT-positive tumors appear to have an excellent prognosis among all age groups [23]. SHH-tumors only show superior survival if the histological subtype is desmoplastic [23].

Giordana et al. [96] could not find a correlation between survival and the presence of anaplasia in their series of adult medulloblastoma samples. Another meta-analysis could not find a correlation between histological subtype and overall survival [5].

Kann et al [97]. demonstrated an improved survival for adult patients treated with craniospinal irradiation plus chemotherapy as compared to patients only receiving radiotherapy. They also found an M0-stage to be a positive prognostic factor. An irradiation dose of 36 Gy was associated with a favorable outcome. Poly-versus mono-agent chemotherapy did not influence prognosis in this trial [97]. Other data support a prognostic improvement through chemotherapy at first line [5].

Padovani et al. [69] found metastatic disease, tumor invasion to brainstem and fourth ventricle, and also reduced radiation dose to the posterior fossa, as negative prognostic factors. They also reported an overall survival of 55% after 10 years. Other investigators also found metastatic disease at tumor recurrence negatively influenced survival, whereas the presence of metastases at the time of initial diagnosis has not been shown to have a negative influence [5].

## CONCLUSIONS

Adult medulloblastoma patients require a multimodal treatment to achieve the best prognostic results. An interdisciplinary team of neurosurgeons, neuroradiologists, anesthesiologists, neuropathologists, radiotherapists, and oncologists is needed to deal with this complex tumor entity.

Adult medulloblastoma is rare, and trials with large numbers of patients are lacking, especially randomized controlled trials. Nevertheless, research dealing with childhood medulloblastoma has delivered a great amount of knowledge concerning tumor biology, points of application for treatment strategies, and prognostic factors. However, there is evidence that there are differences between childhood and adult medulloblastoma, both in terms of their molecular pathology and treatment. Prospective research for molecular pathological characteristics of this tumor will deliver opportunities for more complex and patient-orientated treatment strategies, including targeted therapeutics depending on the molecular tumor biology of individual patients.

In the future, further research is needed to increase surgical success and safety for cerebellar mass lesions, such as intraoperative imaging and fluorescence, functional imaging, and neuromonitoring. Neurosurgical



tumor resection will still be relevant in treatment protocols for medulloblastomas to reduce complications and concerns caused by the tumor mass.

## AUTHOR CONTRIBUTIONS

T.E. literature research and review, conception of manuscript, A.H., E.Y., C.B., A.K. and H.H.S. critical review of the manuscript.

## CONFLICTS OF INTEREST

The authors declared no conflicts of interest.

## REFERENCES

1. Crocetti E, Trama A, Stiller C, Caldarella A, Soffietti R, Jaal J, Weber DC, Ricardi U, Slowinski J, Brandes A, and RARECARE working group. Epidemiology of glial and non-glial brain tumours in Europe. *Eur J Cancer*. 2012; 48:1532–42.  
<https://doi.org/10.1016/j.ejca.2011.12.013>  
PMID:[22227039](https://pubmed.ncbi.nlm.nih.gov/22227039/)
2. Smoll NR, Drummond KJ. The incidence of medulloblastomas and primitive neuroectodermal tumours in adults and children. *J Clin Neurosci*. 2012; 19:1541–44.  
<https://doi.org/10.1016/j.jocn.2012.04.009>  
PMID:[22981874](https://pubmed.ncbi.nlm.nih.gov/22981874/)
3. Won SY, Dubinski D, Behmanesh B, Bernstock JD, Seifert V, Konzalla J, Tritt S, Senft C, Gessler F. Management of hydrocephalus after resection of posterior fossa lesions in pediatric and adult patients—predictors for development of hydrocephalus. *Neurosurg Rev*. 2020; 43:1143–50.  
<https://doi.org/10.1007/s10143-019-01139-8>  
PMID:[31286305](https://pubmed.ncbi.nlm.nih.gov/31286305/)
4. Lai R. Survival of patients with adult medulloblastoma: a population-based study. *Cancer*. 2008; 112:1568–74.  
<https://doi.org/10.1002/cncr.23329> PMID:[18278809](https://pubmed.ncbi.nlm.nih.gov/18278809/)
5. Kocakaya S, Beier CP, Beier D. Chemotherapy increases long-term survival in patients with adult medulloblastoma—a literature-based meta-analysis. *Neuro Oncol*. 2016; 18:408–16.  
<https://doi.org/10.1093/neuonc/nov185>  
PMID:[26359208](https://pubmed.ncbi.nlm.nih.gov/26359208/)
6. Park TS, Hoffman HJ, Hendrick EB, Humphreys RP, Becker LE. Medulloblastoma: clinical presentation and management. Experience at the hospital for sick children, Toronto, 1950–1980. *J Neurosurg*. 1983; 58:543–52.  
<https://doi.org/10.3171/jns.1983.58.4.0543>  
PMID:[6827349](https://pubmed.ncbi.nlm.nih.gov/6827349/)
7. Vinchon M, Leblond P. Medulloblastoma: clinical presentation. *Neurochirurgie*. 2019. [Epub ahead of print].  
<https://doi.org/10.1016/j.neuchi.2019.04.006>  
PMID:[31494131](https://pubmed.ncbi.nlm.nih.gov/31494131/)
8. Pfiffner TJ, Jani R, Mechtler L. Neuro-oncological disorders of the cerebellum. *Neurol Clin*. 2014; 32:913–41.  
<https://doi.org/10.1016/j.ncl.2014.07.011>  
PMID:[25439289](https://pubmed.ncbi.nlm.nih.gov/25439289/)
9. Javalkar V, Khan M, Davis DE. Clinical manifestations of cerebellar disease. *Neurol Clin*. 2014; 32:871–79.  
<https://doi.org/10.1016/j.ncl.2014.07.012>  
PMID:[25439285](https://pubmed.ncbi.nlm.nih.gov/25439285/)
10. Koeller KK, Rushing EJ. From the archives of the AFIP: medulloblastoma: a comprehensive review with radiologic-pathologic correlation. *Radiographics*. 2003; 23:1613–37.  
<https://doi.org/10.1148/rg.236035168>  
PMID:[14615567](https://pubmed.ncbi.nlm.nih.gov/14615567/)
11. Colafati GS, Voicu IP, Carducci C, Miele E, Carai A, Di Loreto S, Marrazzo A, Cacchione A, Cecinati V, Tornesello A, Mastronuzzi A. MRI features as a helpful tool to predict the molecular subgroups of medulloblastoma: state of the art. *Ther Adv Neurol Disord*. 2018; 11:1756286418775375.  
<https://doi.org/10.1177/1756286418775375>  
PMID:[29977341](https://pubmed.ncbi.nlm.nih.gov/29977341/)
12. Korshunov A, Remke M, Werft W, Benner A, Ryzhova M, Witt H, Sturm D, Wittmann A, Schöttler A, Felsberg J, Reifenberger G, Rutkowski S, Scheurlen W, et al. Adult and pediatric medulloblastomas are genetically distinct and require different algorithms for molecular risk stratification. *J Clin Oncol*. 2010; 28:3054–60.  
<https://doi.org/10.1200/JCO.2009.25.7121>  
PMID:[20479417](https://pubmed.ncbi.nlm.nih.gov/20479417/)
13. Eran A, Ozturk A, Aygun N, Izbudak I. Medulloblastoma: atypical CT and MRI findings in children. *Pediatr Radiol*. 2010; 40:1254–62.  
<https://doi.org/10.1007/s00247-009-1429-9>  
PMID:[20386894](https://pubmed.ncbi.nlm.nih.gov/20386894/)
14. Fruehwald-Pallamar J, Puchner SB, Rossi A, Garre ML, Cama A, Koelblinger C, Osborn AG, Thurnher MM. Magnetic resonance imaging spectrum of medulloblastoma. *Neuroradiology*. 2011; 53:387–96.  
<https://doi.org/10.1007/s00234-010-0829-8>  
PMID:[21279509](https://pubmed.ncbi.nlm.nih.gov/21279509/)
15. Beier D, Proescholdt M, Reinert C, Pietsch T, Jones DT, Pfister SM, Hattingen E, Seidel C, Dirven L, Luerding R, Reijneveld J, Warmuth-Metz M, Bonsanto M, et al. Multicenter pilot study of radiochemotherapy as first-

- line treatment for adults with medulloblastoma (NOA-07). *Neuro Oncol.* 2018; 20:400–10.  
<https://doi.org/10.1093/neuonc/nox155>  
PMID:29016837
16. Keil VC, Warmuth-Metz M, Reh C, Enkirch SJ, Reinert C, Beier D, Jones DT, Pietsch T, Schild HH, Hattingen E, Hau P. Imaging biomarkers for adult medulloblastomas: genetic entities may be identified by their MR imaging radiophenotype. *AJNR Am J Neuroradiol.* 2017; 38:1892–98.  
<https://doi.org/10.3174/ajnr.A5313>  
PMID:28798218
17. Chang CH, Housepian EM, Herbert C Jr. An operative staging system and a megavoltage radiotherapeutic technic for cerebellar medulloblastomas. *Radiology.* 1969; 93:1351–9.  
<https://doi.org/10.1148/93.6.1351> PMID:4983156
18. Packer RJ, Sutton LN, Elterman R, Lange B, Goldwein J, Nicholson HS, Mulne L, Boyett J, D'Angio G, Wechsler-Jentsch K. Outcome for children with medulloblastoma treated with radiation and cisplatin, CCNU, and vincristine chemotherapy. *J Neurosurg.* 1994; 81:690–98.  
<https://doi.org/10.3171/jns.1994.81.5.0690>  
PMID:7931615
19. Franceschi E, Hofer S, Brandes AA, Frappaz D, Kortmann RD, Bromberg J, Dangouloff-Ros V, Boddaert N, Hattingen E, Wiestler B, Clifford SC, Figarella-Branger D, Giangaspero F, et al. EANO-EURACAN clinical practice guideline for diagnosis, treatment, and follow-up of post-pubertal and adult patients with medulloblastoma. *Lancet Oncol.* 2019; 20:e715–28.  
[https://doi.org/10.1016/S1470-2045\(19\)30669-2](https://doi.org/10.1016/S1470-2045(19)30669-2)  
PMID:31797797
20. Louis DN, Ohgaki H, Wiestler OD, Cavenee WK, Burger PC, Jouvet A, Scheithauer BW, Kleihues P. The 2007 WHO classification of tumours of the central nervous system. *Acta Neuropathol.* 2007; 114:97–109.  
<https://doi.org/10.1007/s00401-007-0243-4>  
PMID:17618441
21. Louis DN, Perry A, Reifenberger G, von Deimling A, Figarella-Branger D, Cavenee WK, Ohgaki H, Wiestler OD, Kleihues P, Ellison DW. The 2016 world health organization classification of tumors of the central nervous system: a summary. *Acta Neuropathol.* 2016; 131:803–20.  
<https://doi.org/10.1007/s00401-016-1545-1>  
PMID:27157931
22. Taylor MD, Northcott PA, Korshunov A, Remke M, Cho YJ, Clifford SC, Eberhart CG, Parsons DW, Rutkowski S, Gajjar A, Ellison DW, Lichter P, Gilbertson RJ, et al. Molecular subgroups of medulloblastoma: the current consensus. *Acta Neuropathol.* 2012; 123:465–72.  
<https://doi.org/10.1007/s00401-011-0922-z>  
PMID:22134537
23. Kool M, Korshunov A, Remke M, Jones DT, Schlanstein M, Northcott PA, Cho YJ, Koster J, Schouten-van Meeteren A, van Vuurden D, Clifford SC, Pietsch T, von Bueren AO, et al. Molecular subgroups of medulloblastoma: an international meta-analysis of transcriptome, genetic aberrations, and clinical data of Wnt, SHH, group 3, and group 4 medulloblastomas. *Acta Neuropathol.* 2012; 123:473–84.  
<https://doi.org/10.1007/s00401-012-0958-8>  
PMID:22358457
24. Ellison DW, Dalton J, Kocak M, Nicholson SL, Fraga C, Neale G, Kenney AM, Brat DJ, Perry A, Yong WH, Taylor RE, Bailey S, Clifford SC, Gilbertson RJ. Medulloblastoma: clinicopathological correlates of SHH, Wnt, and non-SHH/WNT molecular subgroups. *Acta Neuropathol.* 2011; 121:381–96.  
<https://doi.org/10.1007/s00401-011-0800-8>  
PMID:21267586
25. Remke M, Hielscher T, Northcott PA, Witt H, Ryzhova M, Wittmann A, Benner A, von Deimling A, Scheurlen W, Perry A, Croul S, Kulozik AE, Lichter P, et al. Adult medulloblastoma comprises three major molecular variants. *J Clin Oncol.* 2011; 29:2717–23.  
<https://doi.org/10.1200/JCO.2011.34.9373>  
PMID:21632505
26. Zhao F, Ohgaki H, Xu L, Giangaspero F, Li C, Li P, Yang Z, Wang B, Wang X, Wang Z, Ai L, Zhang J, Luo L, Liu P. Molecular subgroups of adult medulloblastoma: a long-term single-institution study. *Neuro Oncol.* 2016; 18:982–90.  
<https://doi.org/10.1093/neuonc/now050>  
PMID:27106407
27. Cavalli FMG, Remke M, Rampasek L, Peacock J, Shih DJH, Luu B, Garzia L, Torchia J, Nor C, Morrissy AS, Agnihotri S, Thompson YY, Kuzan-Fischer CM, et al. Intertumoral Heterogeneity within Medulloblastoma Subgroups. *Cancer Cell.* 2017; 31:737–54.e6.  
<https://doi.org/10.1016/j.ccell.2017.05.005>  
PMID:28609654
28. Northcott PA, Hielscher T, Dubuc A, Mack S, Shih D, Remke M, Al-Halabi H, Albrecht S, Jabado N, Eberhart CG, Grajkowska W, Weiss WA, Clifford SC, et al. Pediatric and adult sonic hedgehog medulloblastomas are clinically and molecularly distinct. *Acta Neuropathol.* 2011; 122:231–40.  
<https://doi.org/10.1007/s00401-011-0846-7>  
PMID:21681522
29. Clifford SC, Lannering B, Schwalbe EC, Hicks D, O'Toole K, Nicholson SL, Goschzik T, Zur Mühlen A, Figarella-Branger D, Doz F, Rutkowski S, Gustafsson G, Pietsch T, and SIOP-Europe PNET Group. Biomarker-driven

- stratification of disease-risk in non-metastatic medulloblastoma: results from the multi-center HIT-SIOP-PNET4 clinical trial. *Oncotarget*. 2015; 6:38827–39.  
<https://doi.org/10.18632/oncotarget.5149>  
PMID:[26420814](https://pubmed.ncbi.nlm.nih.gov/26420814/)
30. Zhukova N, Ramaswamy V, Remke M, Pfaff E, Shih DJ, Martin DC, Castelo-Branco P, Baskin B, Ray PN, Bouffet E, von Bueren AO, Jones DT, Northcott PA, et al. Subgroup-specific prognostic implications of TP53 mutation in medulloblastoma. *J Clin Oncol*. 2013; 31:2927–35.  
<https://doi.org/10.1200/JCO.2012.48.5052>  
PMID:[23835706](https://pubmed.ncbi.nlm.nih.gov/23835706/)
31. Gibson P, Tong Y, Robinson G, Thompson MC, Currie DS, Eden C, Kranenburg TA, Hogg T, Poppleton H, Martin J, Finkelstein D, Pounds S, Weiss A, et al. Subtypes of medulloblastoma have distinct developmental origins. *Nature*. 2010; 468:1095–99.  
<https://doi.org/10.1038/nature09587> PMID:[21150899](https://pubmed.ncbi.nlm.nih.gov/21150899/)
32. Mata-Mbemba D, Zapotocky M, Laughlin S, Taylor MD, Ramaswamy V, Raybaud C. MRI characteristics of primary tumors and metastatic lesions in molecular subgroups of pediatric medulloblastoma: a single-center study. *AJNR Am J Neuroradiol*. 2018; 39:949–55.  
<https://doi.org/10.3174/ajnr.A5578> PMID:[29545246](https://pubmed.ncbi.nlm.nih.gov/29545246/)
33. Teo WY, Shen J, Su JM, Yu A, Wang J, Chow WY, Li X, Jones J, Dauser R, Whitehead W, Adesina AM, Chintagumpala M, Man TK, Lau CC. Implications of tumor location on subtypes of medulloblastoma. *Pediatr Blood Cancer*. 2013; 60:1408–10.  
<https://doi.org/10.1002/pbc.24511> PMID:[23512859](https://pubmed.ncbi.nlm.nih.gov/23512859/)
34. Perreault S, Ramaswamy V, Achrol AS, Chao K, Liu TT, Shih D, Remke M, Schubert S, Bouffet E, Fisher PG, Partap S, Vogel H, Taylor MD, et al. MRI surrogates for molecular subgroups of medulloblastoma. *AJNR Am J Neuroradiol*. 2014; 35:1263–69.  
<https://doi.org/10.3174/ajnr.A3990>  
PMID:[24831600](https://pubmed.ncbi.nlm.nih.gov/24831600/)
35. Patay Z, DeSain LA, Hwang SN, Coan A, Li Y, Ellison DW. MR imaging characteristics of wingless-type-subgroup pediatric medulloblastoma. *AJNR Am J Neuroradiol*. 2015; 36:2386–93.  
<https://doi.org/10.3174/ajnr.A4495>  
PMID:[26338912](https://pubmed.ncbi.nlm.nih.gov/26338912/)
36. Greenberg MS. (2016). *Handbook of Neurosurgery*. New York: Thieme.
37. Thompson EM, Hielscher T, Bouffet E, Remke M, Luu B, Gururangan S, McLendon RE, Bigner DD, Lipp ES, Perreault S, Cho YJ, Grant G, Kim SK, et al. Prognostic value of medulloblastoma extent of resection after accounting for molecular subgroup: a retrospective integrated clinical and molecular analysis. *Lancet Oncol*. 2016; 17:484–95.  
[https://doi.org/10.1016/S1470-2045\(15\)00581-1](https://doi.org/10.1016/S1470-2045(15)00581-1)  
PMID:[26976201](https://pubmed.ncbi.nlm.nih.gov/26976201/)
38. Call JA, Naik M, Rodriguez FJ, Giannini C, Wu W, Buckner JC, Parney IF, Laack NN. Long-term outcomes and role of chemotherapy in adults with newly diagnosed medulloblastoma. *Am J Clin Oncol*. 2014; 37:1–7.  
<https://doi.org/10.1097/COC.0b013e31826b9cf0>  
PMID:[23111362](https://pubmed.ncbi.nlm.nih.gov/23111362/)
39. Saladino A, Lamperti M, Mangraviti A, Legnani FG, Prada FU, Casali C, Caputi L, Borrelli P, DiMeco F. The semisitting position: analysis of the risks and surgical outcomes in a contemporary series of 425 adult patients undergoing cranial surgery. *J Neurosurg*. 2017; 127:867–76.  
<https://doi.org/10.3171/2016.8.JNS16719>  
PMID:[27982770](https://pubmed.ncbi.nlm.nih.gov/27982770/)
40. Spektor S, Fraifeld S, Margolin E, Saseedharan S, Eimerl D, Umansky F. Comparison of outcomes following complex posterior fossa surgery performed in the sitting versus lateral position. *J Clin Neurosci*. 2015; 22:705–12.  
<https://doi.org/10.1016/j.jocn.2014.12.005>  
PMID:[25752232](https://pubmed.ncbi.nlm.nih.gov/25752232/)
41. Rath GP, Bithal PK, Chaturvedi A, Dash HH. Complications related to positioning in posterior fossa craniectomy. *J Clin Neurosci*. 2007; 14:520–25.  
<https://doi.org/10.1016/j.jocn.2006.02.010>  
PMID:[17430775](https://pubmed.ncbi.nlm.nih.gov/17430775/)
42. Himes BT, Mallory GW, Abcejo AS, Pasternak J, Atkinson JL, Meyer FB, Marsh WR, Link MJ, Clarke MJ, Perkins W, Van Gompel JJ. Contemporary analysis of the intraoperative and perioperative complications of neurosurgical procedures performed in the sitting position. *J Neurosurg*. 2017; 127:182–88.  
<https://doi.org/10.3171/2016.5.JNS152328>  
PMID:[27494821](https://pubmed.ncbi.nlm.nih.gov/27494821/)
43. Mavarez-Martinez A, Israelyan LA, Soghomonyan S, Fiorda-Diaz J, Sandhu G, Shimansky VN, Ammirati M, Palettas M, Lubnin AY, Bergese SD. The effects of patient positioning on the outcome during posterior cranial fossa and pineal region surgery. *Front Surg*. 2020; 7:9.  
<https://doi.org/10.3389/fsurg.2020.00009>  
PMID:[32232048](https://pubmed.ncbi.nlm.nih.gov/32232048/)
44. Slotty PJ, Abdulazim A, Kodama K, Javadi M, Hänggi D, Seifert V, Szelényi A. Intraoperative neurophysiological monitoring during resection of infratentorial lesions: the surgeon's view. *J Neurosurg*. 2017; 126:281–88.  
<https://doi.org/10.3171/2015.11.JNS15991>  
PMID:[26918482](https://pubmed.ncbi.nlm.nih.gov/26918482/)

45. Kodama K, Javadi M, Seifert V, Szelényi A. Conjunct SEP and MEP monitoring in resection of infratentorial lesions: lessons learned in a cohort of 210 patients. *J Neurosurg.* 2014; 121:1453–61.  
<https://doi.org/10.3171/2014.7.JNS131821>  
PMID:[25216065](https://pubmed.ncbi.nlm.nih.gov/25216065/)
46. Cornelius JF, Schipper J, Tortora A, Krause-Molle Z, Smuga M, Petridis AK, Steiger HJ. Continuous and dynamic facial nerve mapping during surgery of cerebellopontine angle tumors: clinical pilot series. *World Neurosurg.* 2018; 119:e855–63.  
<https://doi.org/10.1016/j.wneu.2018.07.286>  
PMID:[30099190](https://pubmed.ncbi.nlm.nih.gov/30099190/)
47. Wibroe M, Rochat P, Juhler M. Cerebellar mutism syndrome and other complications after surgery in the posterior fossa in adults: a prospective study. *World Neurosurg.* 2018; 110:e738–46.  
<https://doi.org/10.1016/j.wneu.2017.11.100>  
PMID:[29180084](https://pubmed.ncbi.nlm.nih.gov/29180084/)
48. Barone DG, Lawrie TA, Hart MG. Image guided surgery for the resection of brain tumours. *Cochrane Database Syst Rev.* 2014; 2014:CD009685.  
<https://doi.org/10.1002/14651858.CD009685.pub2>  
PMID:[24474579](https://pubmed.ncbi.nlm.nih.gov/24474579/)
49. Sharma M, Ambekar S, Ahmed O, Nixon M, Sharma A, Nanda A, Guthikonda B. The utility and limitations of intraoperative near-infrared indocyanine green videoangiography in aneurysm surgery. *World Neurosurg.* 2014; 82:e607–13.  
<https://doi.org/10.1016/j.wneu.2014.05.033>  
PMID:[24907439](https://pubmed.ncbi.nlm.nih.gov/24907439/)
50. Roessler K, Krawagna M, Dörfler A, Buchfelder M, Ganslandt O. Essentials in intraoperative indocyanine green videoangiography assessment for intracranial aneurysm surgery: conclusions from 295 consecutively clipped aneurysms and review of the literature. *Neurosurg Focus.* 2014; 36:E7.  
<https://doi.org/10.3171/2013.11.FOCUS13475>  
PMID:[24484260](https://pubmed.ncbi.nlm.nih.gov/24484260/)
51. Lai LT, Morgan MK. Use of indocyanine green videoangiography during intracranial aneurysm surgery reduces the incidence of postoperative ischaemic complications. *J Clin Neurosci.* 2014; 21:67–72.  
<https://doi.org/10.1016/j.jocn.2013.04.002>  
PMID:[24090515](https://pubmed.ncbi.nlm.nih.gov/24090515/)
52. Stummer W, Tonn JC, Goetz C, Ullrich W, Stepp H, Bink A, Pietsch T, Pichlmeier U. 5-Aminolevulinic acid-derived tumor fluorescence: the diagnostic accuracy of visible fluorescence qualities as corroborated by spectrometry and histology and postoperative imaging. *Neurosurgery.* 2014; 74:310–19.  
<https://doi.org/10.1227/NEU.0000000000000267>  
PMID:[24335821](https://pubmed.ncbi.nlm.nih.gov/24335821/)
53. Stummer W, Novotny A, Stepp H, Goetz C, Bise K, Reulen HJ. Fluorescence-guided resection of glioblastoma multiforme by using 5-aminolevulinic acid-induced porphyrins: a prospective study in 52 consecutive patients. *J Neurosurg.* 2000; 93:1003–13.  
<https://doi.org/10.3171/jns.2000.93.6.1003>  
PMID:[11117842](https://pubmed.ncbi.nlm.nih.gov/11117842/)
54. Stummer W, Tonn JC, Mehdorn HM, Nestler U, Franz K, Goetz C, Bink A, Pichlmeier U, and ALA-Glioma Study Group. Counterbalancing risks and gains from extended resections in Malignant glioma surgery: a supplemental analysis from the randomized 5-aminolevulinic acid glioma resection study. *Clinical article. J Neurosurg.* 2011; 114:613–23.  
<https://doi.org/10.3171/2010.3.JNS097>  
PMID:[20397896](https://pubmed.ncbi.nlm.nih.gov/20397896/)
55. Briel-Pump A, Beez T, Ebbert L, Remke M, Weinhold S, Sabel MC, Sorg RV. Accumulation of protoporphyrin IX in medulloblastoma cell lines and sensitivity to subsequent photodynamic treatment. *J Photochem Photobiol B.* 2018; 189:298–305.  
<https://doi.org/10.1016/j.jphotobiol.2018.11.002>  
PMID:[30445362](https://pubmed.ncbi.nlm.nih.gov/30445362/)
56. Preuß M, Renner C, Krupp W, Christiansen H, Fischer L, Merckenschlager A, Kieß W, Müller W, Manzo N, Meixensberger J, Nestler U. The use of 5-aminolevulinic acid fluorescence guidance in resection of pediatric brain tumors. *Childs Nerv Syst.* 2013; 29:1263–67.  
<https://doi.org/10.1007/s00381-013-2159-8>  
PMID:[23708867](https://pubmed.ncbi.nlm.nih.gov/23708867/)
57. Schwake M, Schipmann S, Mütter M, Köchling M, Brentrup A, Stummer W. 5-ALA fluorescence-guided surgery in pediatric brain tumors—a systematic review. *Acta Neurochir (Wien).* 2019; 161:1099–108.  
<https://doi.org/10.1007/s00701-019-03898-1>  
PMID:[30989383](https://pubmed.ncbi.nlm.nih.gov/30989383/)
58. Avula S, Mallucci CL, Pizer B, Garlick D, Crooks D, Abernethy LJ. Intraoperative 3-Tesla MRI in the management of paediatric cranial tumours—initial experience. *Pediatr Radiol.* 2012; 42:158–67.  
<https://doi.org/10.1007/s00247-011-2261-6>  
PMID:[22002861](https://pubmed.ncbi.nlm.nih.gov/22002861/)
59. Choudhri AF, Klimo P Jr, Auschwitz TS, Whitehead MT, Boop FA. 3T intraoperative MRI for management of pediatric CNS neoplasms. *AJNR Am J Neuroradiol.* 2014; 35:2382–87.  
<https://doi.org/10.3174/ajnr.A4040> PMID:[25059696](https://pubmed.ncbi.nlm.nih.gov/25059696/)
60. Di Rocco F, Jucá CE, Zerah M, Sainte-Rose C. Endoscopic third ventriculostomy and posterior fossa tumors. *World Neurosurg.* 2013; 79:S18.e15–19.  
<https://doi.org/10.1016/j.wneu.2012.02.018>  
PMID:[22381845](https://pubmed.ncbi.nlm.nih.gov/22381845/)



61. Hoffman HJ, Hendrick EB, Humphreys RP. Metastasis via ventriculoperitoneal shunt in patients with medulloblastoma. *J Neurosurg.* 1976; 44:562–66. <https://doi.org/10.3171/jns.1976.44.5.0562> PMID:1262915
62. Jamjoom ZA, Jamjoom AB, Sulaiman AH, Naim-Ur-Rahman, al Rabiaa A. Systemic metastasis of medulloblastoma through ventriculoperitoneal shunt: report of a case and critical analysis of the literature. *Surg Neurol.* 1993; 40:403–10. [https://doi.org/10.1016/0090-3019\(93\)90221-1](https://doi.org/10.1016/0090-3019(93)90221-1) PMID:8211658
63. Xu K, Khine KT, Ooi YC, Quinsey CS. A systematic review of shunt-related extraneural metastases of primary central nervous system tumors. *Clin Neurol Neurosurg.* 2018; 174:239–43. <https://doi.org/10.1016/j.clineuro.2018.09.038> PMID:30292900
64. Schneider C, Ramaswamy V, Kulkarni AV, Rutka JT, Remke M, Tabori U, Hawkins C, Bouffet E, Taylor MD. Clinical implications of medulloblastoma subgroups: incidence of CSF diversion surgery. *J Neurosurg Pediatr.* 2015; 15:236–42. <https://doi.org/10.3171/2014.9.PEDS14280> PMID:25525930
65. Zattra CM, Zhang DY, Broggi M, Velz J, Vasella F, Seggewiss D, Schiavolin S, Bozinov O, Krayenbühl N, Sarnthein J, Ferroli P, Regli L, Stienen MN. Repeated craniotomies for intracranial tumors: is the risk increased? pooled analysis of two prospective, institutional registries of complications and outcomes. *J Neurooncol.* 2019; 142:49–57. <https://doi.org/10.1007/s11060-018-03058-y> PMID:30474767
66. De B, Beal K, De Braganca KC, Souweidane MM, Dunkel IJ, Khakoo Y, Gilheaney SW, DeAngelis LM, Menzel P, Patel SH, Wolden SL. Long-term outcomes of adult medulloblastoma patients treated with radiotherapy. *J Neurooncol.* 2018; 136:95–104. <https://doi.org/10.1007/s11060-017-2627-1> PMID:29019042
67. Brandes AA, Franceschi E, Tosoni A, Blatt V, Ermani M. Long-term results of a prospective study on the treatment of medulloblastoma in adults. *Cancer.* 2007; 110:2035–41. <https://doi.org/10.1002/cncr.23003> PMID:17823910
68. Buglione M, Ghirardelli P, Triggiani L, Pedretti S, Pasinetti N, De Bari B, Tonoli S, Borghetti P, Spiazzi L, Magrini SM. Radiotherapy for adult medulloblastoma: Long term result from a single institution. A review of prognostic factors and why we do need a multi-institutional cooperative program. *Rep Pract Oncol Radiother.* 2015; 20:284–91. <https://doi.org/10.1016/j.rpor.2015.03.003> PMID:26109916
69. Padovani L, Sunyach MP, Perol D, Mercier C, Alapetite C, Haie-Meder C, Hoffstetter S, Muracciole X, Kerr C, Wagner JP, Lagrange JL, Maire JP, Cowen D, et al. Common strategy for adult and pediatric medulloblastoma: a multicenter series of 253 adults. *Int J Radiat Oncol Biol Phys.* 2007; 68:433–40. <https://doi.org/10.1016/j.ijrobp.2006.12.030> PMID:17498567
70. Packer RJ, Goldwein J, Nicholson HS, Vezina LG, Allen JC, Ris MD, Muraszko K, Rorke LB, Wara WM, Cohen BH, Boyett JM. Treatment of children with medulloblastomas with reduced-dose craniospinal radiation therapy and adjuvant chemotherapy: a children's cancer group study. *J Clin Oncol.* 1999; 17:2127–36. <https://doi.org/10.1200/JCO.1999.17.7.2127> PMID:10561268
71. Packer RJ, Sutton LN, Goldwein JW, Perilongo G, Bunin G, Ryan J, Cohen BH, D'Angio G, Kramer ED, Zimmerman RA. Improved survival with the use of adjuvant chemotherapy in the treatment of medulloblastoma. *J Neurosurg.* 1991; 74:433–40. <https://doi.org/10.3171/jns.1991.74.3.0433> PMID:1847194
72. Atalar B, Ozsahin M, Call J, Napieralska A, Kamer S, Villa S, Erpolat P, Negretti L, Lassen-Ramshad Y, Onal C, Akyurek S, Ugurluer G, Baumert BG, et al. Treatment outcome and prognostic factors for adult patients with medulloblastoma: the rare cancer network (RCN) experience. *Radiother Oncol.* 2018; 127:96–102. <https://doi.org/10.1016/j.radonc.2017.12.028> PMID:29373196
73. Brandes AA, Bartolotti M, Marucci G, Ghimenton C, Agati R, Fioravanti A, Mascarini M, Volpin L, Ammannati F, Masotto B, Gardiman MP, De Biase D, Tallini G, et al. New perspectives in the treatment of adult medulloblastoma in the era of molecular oncology. *Crit Rev Oncol Hematol.* 2015; 94:348–59. <https://doi.org/10.1016/j.critrevonc.2014.12.016> PMID:25600839
74. Friedrich C, von Bueren AO, von Hoff K, Kwicien R, Pietsch T, Warmuth-Metz M, Hau P, Deinlein F, Kuehl J, Kortmann RD, Rutkowski S. Treatment of adult nonmetastatic medulloblastoma patients according to the paediatric HIT 2000 protocol: a prospective observational multicentre study. *Eur J Cancer.* 2013; 49:893–903. <https://doi.org/10.1016/j.ejca.2012.10.006> PMID:23182688
75. Moots PL, O'Neill A, Londer H, Mehta M, Blumenthal DT, Barger GR, Grunnet ML, Grossman S, Gilbert MR,



- Schiff D. Preradiation chemotherapy for adult high-risk medulloblastoma: a trial of the ECOG-ACRIN cancer research group (E4397). *Am J Clin Oncol*. 2018; 41:588–94.  
<https://doi.org/10.1097/COC.0000000000000326>  
PMID:[27635620](https://pubmed.ncbi.nlm.nih.gov/27635620/)
76. Hart MG, Garside R, Rogers G, Stein K, Grant R. Temozolomide for high grade glioma. *Cochrane Database Syst Rev*. 2013; 2013:CD007415.  
<https://doi.org/10.1002/14651858.CD007415.pub2>  
PMID:[23633341](https://pubmed.ncbi.nlm.nih.gov/23633341/)
77. Aguilera D, Mazewski C, Fangusaro J, MacDonald TJ, McNall-Knapp RY, Hayes LL, Kim S, Castellino RC. Response to bevacizumab, irinotecan, and temozolomide in children with relapsed medulloblastoma: a multi-institutional experience. *Childs Nerv Syst*. 2013; 29:589–96.  
<https://doi.org/10.1007/s00381-012-2013-4>  
PMID:[23296323](https://pubmed.ncbi.nlm.nih.gov/23296323/)
78. Bonney PA, Santucci JA, Maurer AJ, Sughrue ME, McNall-Knapp RY, Battiste JD. Dramatic response to temozolomide, irinotecan, and bevacizumab for recurrent medulloblastoma with widespread osseous metastases. *J Clin Neurosci*. 2016; 26:161–63.  
<https://doi.org/10.1016/j.jocn.2015.10.022>  
PMID:[26777082](https://pubmed.ncbi.nlm.nih.gov/26777082/)
79. Grill J, Georger B, Gesner L, Perek D, Leblond P, Cañete A, Aerts I, Madero L, de Toledo Codina JS, Verlooy J, Estlin E, Cisar L, Breazna A, et al, and European Consortium Innovative Therapies for Children with Cancer (ITCC), and the European Society for Paediatric Oncology (SIOPE) brain tumor group. Phase II study of irinotecan in combination with temozolomide (TEMIRI) in children with recurrent or refractory medulloblastoma: a joint ITCC and SIOPE brain tumor study. *Neuro Oncol*. 2013; 15:1236–43.  
<https://doi.org/10.1093/neuonc/not097>  
PMID:[23857707](https://pubmed.ncbi.nlm.nih.gov/23857707/)
80. Ruggiero A, Rizzo D, Attinà G, Lazzareschi I, Mastrangelo S, Maurizi P, Migliorati R, Bertolini P, Pastore M, Colosimo C, Riccardi R. Phase I study of temozolomide combined with oral etoposide in children with recurrent or progressive medulloblastoma. *Eur J Cancer*. 2010; 46:2943–49.  
<https://doi.org/10.1016/j.ejca.2010.05.016>  
PMID:[20538454](https://pubmed.ncbi.nlm.nih.gov/20538454/)
81. Cefalo G, Massimino M, Ruggiero A, Barone G, Ridola V, Spreafico F, Potepan P, Abate ME, Mascarini M, Garrè ML, Perilongo G, Madon E, Colosimo C, Riccardi R. Temozolomide is an active agent in children with recurrent medulloblastoma/primitive neuroectodermal tumor: an Italian multi-institutional phase II trial. *Neuro Oncol*. 2014; 16:748–53.  
<https://doi.org/10.1093/neuonc/not320>  
PMID:[24482446](https://pubmed.ncbi.nlm.nih.gov/24482446/)
82. Rudin CM, Hann CL, Laterra J, Yauch RL, Callahan CA, Fu L, Holcomb T, Stinson J, Gould SE, Coleman B, LoRusso PM, Von Hoff DD, de Sauvage FJ, Low JA. Treatment of medulloblastoma with hedgehog pathway inhibitor GDC-0449. *N Engl J Med*. 2009; 361:1173–78.  
<https://doi.org/10.1056/NEJMoa0902903>  
PMID:[19726761](https://pubmed.ncbi.nlm.nih.gov/19726761/)
83. Rudin CM. Vismodegib. *Clin Cancer Res*. 2012; 18:3218–22.  
<https://doi.org/10.1158/1078-0432.CCR-12-0568>  
PMID:[22679179](https://pubmed.ncbi.nlm.nih.gov/22679179/)
84. Chaturvedi NK, Kling MJ, Coulter DW, McGuire TR, Ray S, Keshner V, Joshi SS, Sharp JG. Improved therapy for medulloblastoma: targeting hedgehog and PI3K-mTOR signaling pathways in combination with chemotherapy. *Oncotarget*. 2018; 9:16619–33.  
<https://doi.org/10.18632/oncotarget.24618>  
PMID:[29682173](https://pubmed.ncbi.nlm.nih.gov/29682173/)
85. Lou E, Schomaker M, Wilson JD, Ahrens M, Dolan M, Nelson AC. Complete and sustained response of adult medulloblastoma to first-line sonic hedgehog inhibition with vismodegib. *Cancer Biol Ther*. 2016; 17:1010–16.  
<https://doi.org/10.1080/15384047.2016.1220453>  
PMID:[27682250](https://pubmed.ncbi.nlm.nih.gov/27682250/)
86. Robinson GW, Orr BA, Wu G, Gururangan S, Lin T, Qaddoumi I, Packer RJ, Goldman S, Prados MD, Desjardins A, Chintagumpala M, Takebe N, Kaste SC, et al. Vismodegib exerts targeted efficacy against recurrent sonic hedgehog-subgroup medulloblastoma: results from phase II pediatric brain tumor consortium studies PBTC-025B and PBTC-032. *J Clin Oncol*. 2015; 33:2646–54.  
<https://doi.org/10.1200/JCO.2014.60.1591>  
PMID:[26169613](https://pubmed.ncbi.nlm.nih.gov/26169613/)
87. Frankel A, Lau Q, Olson S. Lymph node metastasis of medulloblastoma in a young adult. *J Clin Neurosci*. 2009; 16:1485–86.  
<https://doi.org/10.1016/j.jocn.2009.01.012>  
PMID:[19581092](https://pubmed.ncbi.nlm.nih.gov/19581092/)
88. Menzilcioglu MS, Citil S, Avcu S. Spinal metastasis of medulloblastoma in adults. *Spine J*. 2015; 15:e1–2.  
<https://doi.org/10.1016/j.spinee.2015.05.006>  
PMID:[25982440](https://pubmed.ncbi.nlm.nih.gov/25982440/)
89. Rochkind S, Blatt I, Sadeh M, Goldhammer Y. Extracranial metastases of medulloblastoma in adults: literature review. *J Neurol Neurosurg Psychiatry*. 1991; 54:80–86.  
<https://doi.org/10.1136/jnnp.54.1.80>  
PMID:[2010766](https://pubmed.ncbi.nlm.nih.gov/2010766/)

90. Eberhart CG, Cohen KJ, Tihan T, Goldthwaite PT, Burger PC. Medulloblastomas with systemic metastases: evaluation of tumor histopathology and clinical behavior in 23 patients. *J Pediatr Hematol Oncol*. 2003; 25:198–203.  
<https://doi.org/10.1097/00043426-200303000-00004>  
PMID:[12621237](https://pubmed.ncbi.nlm.nih.gov/12621237/)
91. Mazloom A, Zangeneh AH, Paulino AC. Prognostic factors after extraneural metastasis of medulloblastoma. *Int J Radiat Oncol Biol Phys*. 2010; 78:72–78.  
<https://doi.org/10.1016/j.ijrobp.2009.07.1729>  
PMID:[20133080](https://pubmed.ncbi.nlm.nih.gov/20133080/)
92. Wang X, Dubuc AM, Ramaswamy V, Mack S, Gendoo DM, Remke M, Wu X, Garzia L, Luu B, Cavalli F, Peacock J, López B, Skowron P, et al. Medulloblastoma subgroups remain stable across primary and metastatic compartments. *Acta Neuropathol*. 2015; 129:449–57.  
<https://doi.org/10.1007/s00401-015-1389-0>  
PMID:[25689980](https://pubmed.ncbi.nlm.nih.gov/25689980/)
93. von Bueren AO, Friedrich C, von Hoff K, Kwicien R, Müller K, Pietsch T, Warmuth-Metz M, Hau P, Benesch M, Kuehl J, Kortmann RD, Rutkowski S. Metastatic medulloblastoma in adults: outcome of patients treated according to the HIT2000 protocol. *Eur J Cancer*. 2015; 51:2434–43.  
<https://doi.org/10.1016/j.ejca.2015.06.124>  
PMID:[26254812](https://pubmed.ncbi.nlm.nih.gov/26254812/)
94. Hoff KV, Hinkes B, Gerber NU, Deinlein F, Mittler U, Urban C, Benesch M, Warmuth-Metz M, Soerensen N, Zwiener I, Goette H, Schlegel PG, Pietsch T, et al. Long-term outcome and clinical prognostic factors in children with medulloblastoma treated in the prospective randomised multicentre trial HIT'91. *Eur J Cancer*. 2009; 45:1209–17.  
<https://doi.org/10.1016/j.ejca.2009.01.015>  
PMID:[19250820](https://pubmed.ncbi.nlm.nih.gov/19250820/)
95. Rodriguez FJ, Eberhart C, O'Neill BP, Slezak J, Burger PC, Goldthwaite P, Wu W, Giannini C. Histopathologic grading of adult medulloblastomas. *Cancer*. 2007; 109:2557–65.  
<https://doi.org/10.1002/cncr.22717>  
PMID:[17487854](https://pubmed.ncbi.nlm.nih.gov/17487854/)
96. Giordana MT, D'Agostino C, Pollo B, Silvani A, Ferracini R, Paiolo A, Ghiglione P, Chiò A. Anaplasia is rare and does not influence prognosis in adult medulloblastoma. *J Neuropathol Exp Neurol*. 2005; 64:869–74.  
<https://doi.org/10.1097/01.jnen.0000182980.64236.01> PMID:[16215458](https://pubmed.ncbi.nlm.nih.gov/16215458/)
97. Kann BH, Lester-Coll NH, Park HS, Yeboa DN, Kelly JR, Baehring JM, Becker KP, Yu JB, Bindra RS, Roberts KB. Adjuvant chemotherapy and overall survival in adult medulloblastoma. *Neuro Oncol*. 2017; 19:259–69.  
<https://doi.org/10.1093/neuonc/now150>  
PMID:[27540083](https://pubmed.ncbi.nlm.nih.gov/27540083/)
